# Supplementary material for: Polyimide-Derived Supramolecular Systems Containing Various Amounts of Azochromophore for Optical Storage Uses
Source: MDPI journal article supplement (doi:10.3390/polym15041056), 2023-02-20
Supplement: s1 [file s1]

# Polyimide-derived supramolecular systems containing various amounts of an azo-derivative for optical storage uses

Andreea Irina Barzic<sup>1</sup>, Ion Sava<sup>1</sup>, Raluca Marinica Albu<sup>1</sup>, Cristian Ursu<sup>1</sup>, Gabriela Lisa<sup>2</sup> and Iuliana Stoica<sup>1,\*</sup>

<sup>1</sup> "Petru Poni" Institute of Macromolecular Chemistry, 41A Grigore Ghica Voda Alley, 700487 Iasi, Romania

<sup>2</sup> Faculty of Chemical Engineering and Environmental Protection "Cristofor Simionescu", "Gheorghe Asachi" Technical University of Iasi-Romania, 73 Prof. dr. doc. D. Mangeron Street, 700050 Iasi, Romania

\* Correspondence: stoica\_iuliana@icmpp.ro (I.S.)

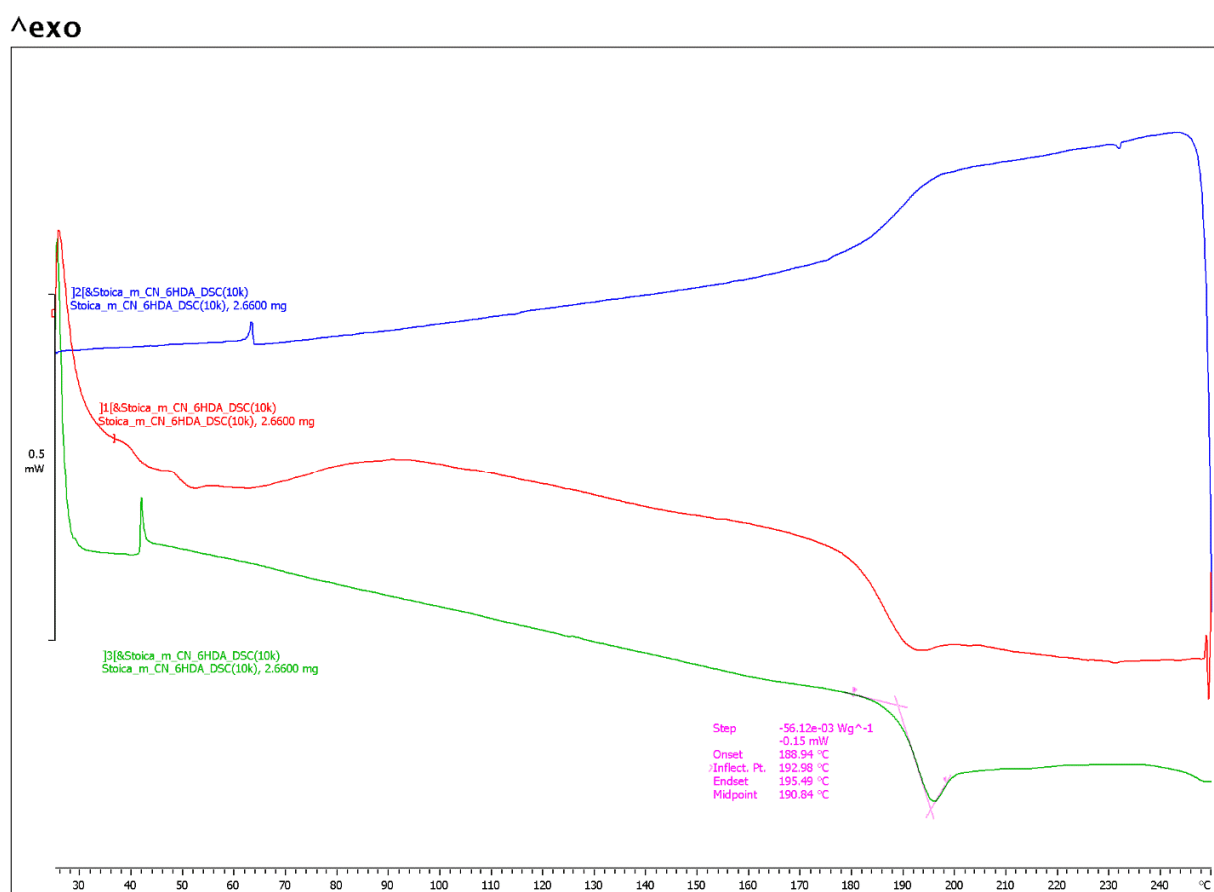

Lab: METTLER

STAR<sup>e</sup> SW 9.10

Figure S1. DSC curve of SPIN0 sample.

^exo

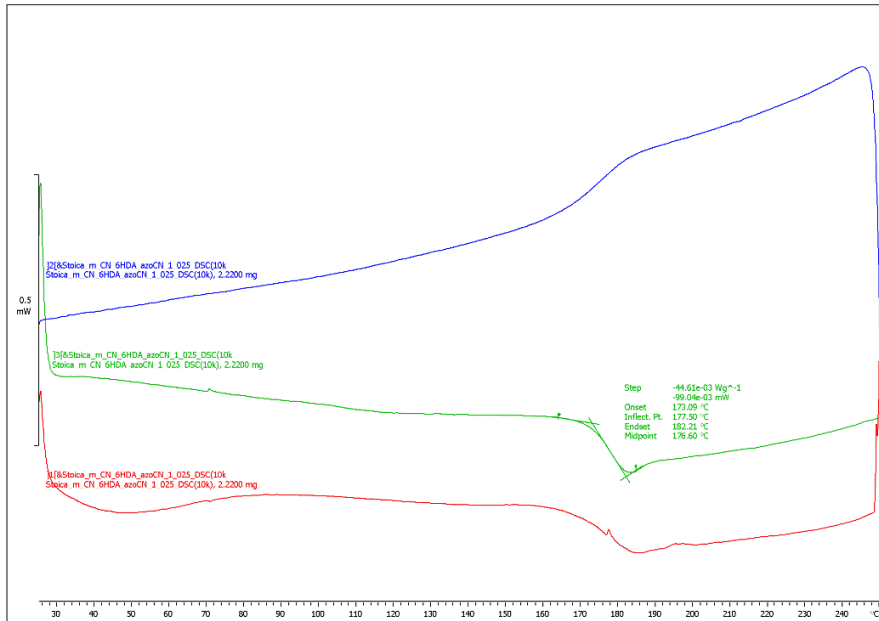

Lab: METTLER

STAR<sup>®</sup> SW 9.10

Figure S2. DSC curve of SPIN25 sample.

^exo

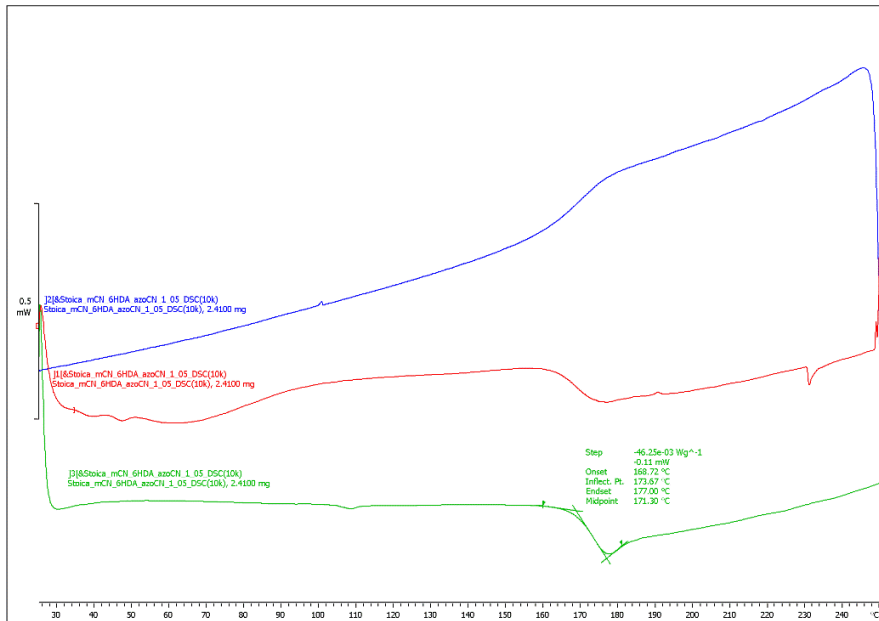

Lab: METTLER

STAR<sup>®</sup> SW 9.10

Figure S3. DSC curve of SPIN50 sample.

^exo

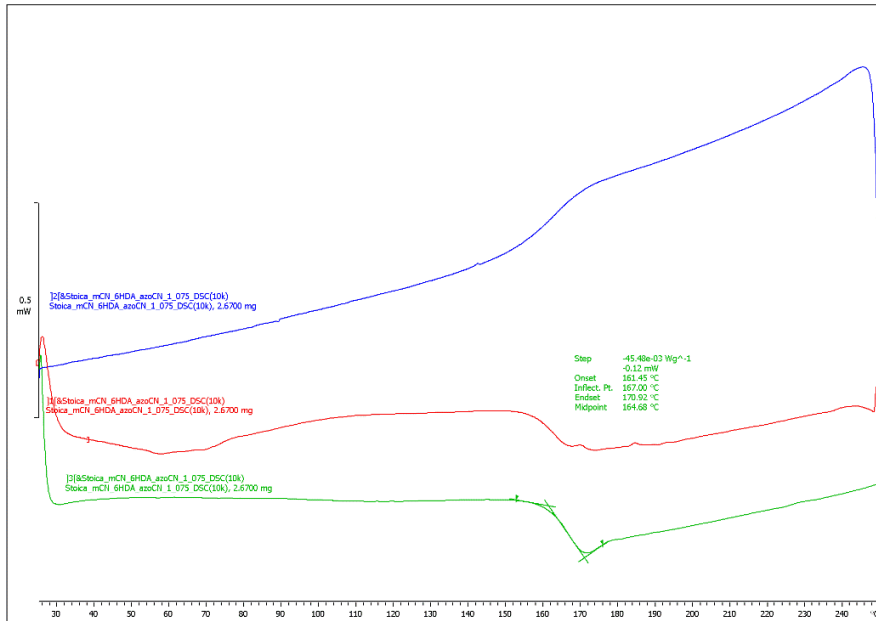

Lab: METTLER

STAR<sup>®</sup> SW 9.10

Figure S4. DSC curve of SPIN75 sample.

^exo

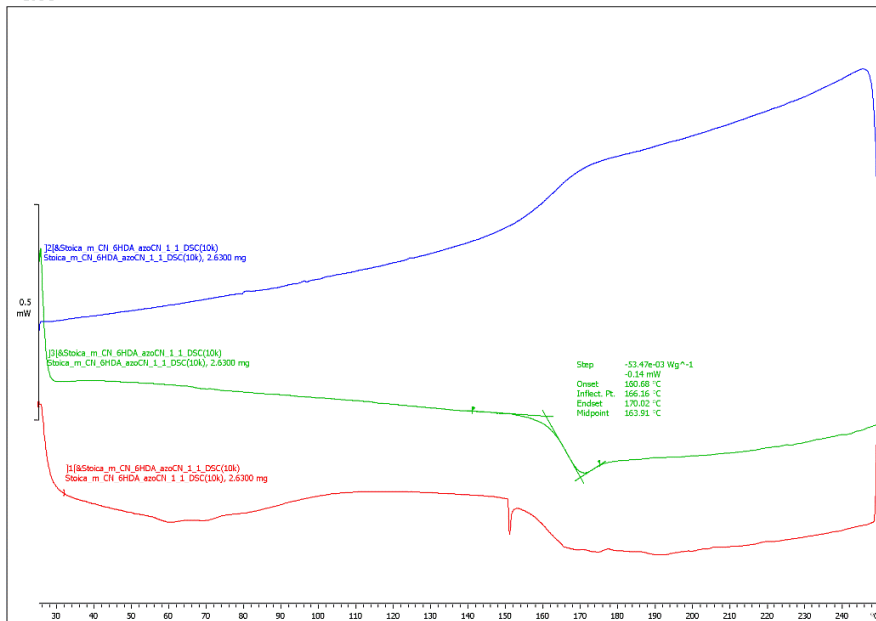

Lab: METTLER

STAR<sup>®</sup> SW 9.10

Figure S5. DSC curve of SPIN100 sample.
